# Supplementary material for: Hepatitis B virus stimulates G6PD expression through HBx-mediated Nrf2 activation
Source: PubMed Central journal article supplement (PMC4670929; doi:10.1038/cddis.2015.322), 2015-11-19
Supplement: cddis2015322x2.pdf [file cddis2015322x2.pdf]

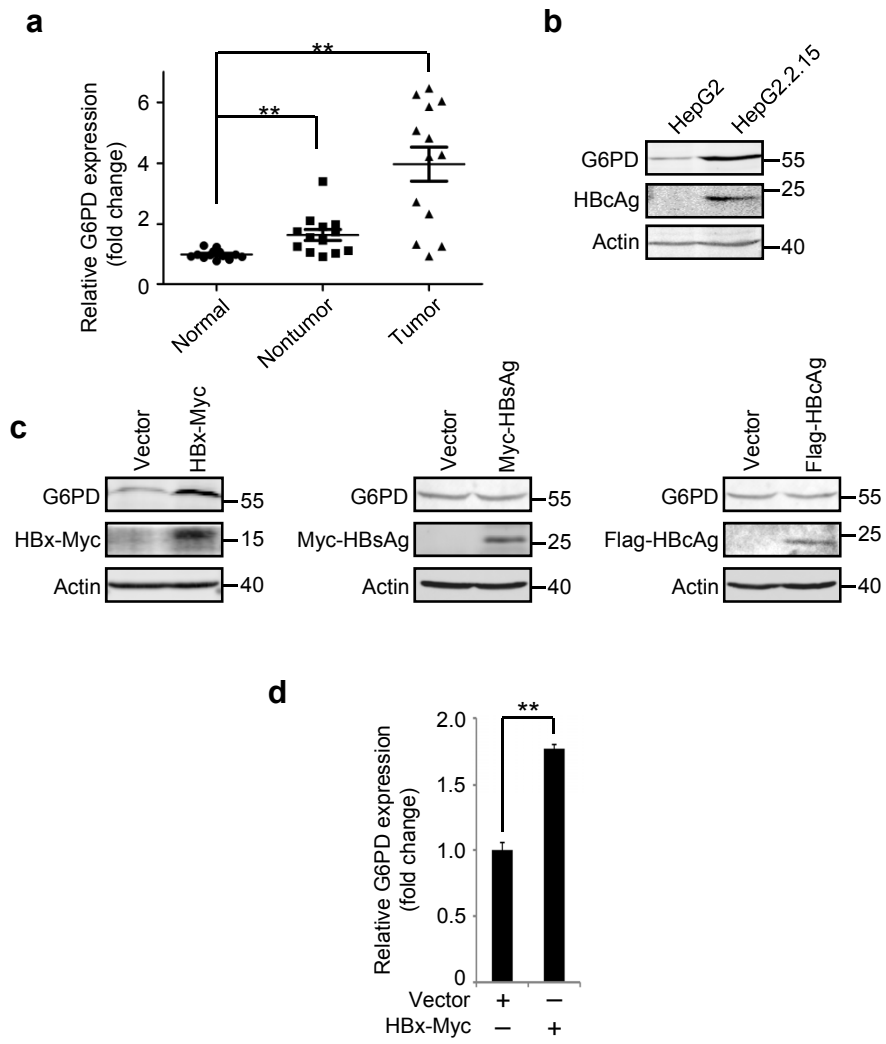

Supplementary Figure 1

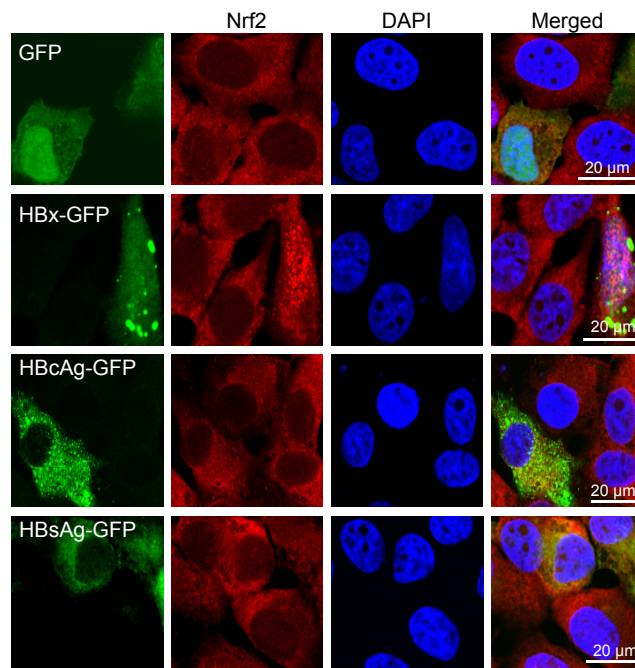

Supplementary Figure 2

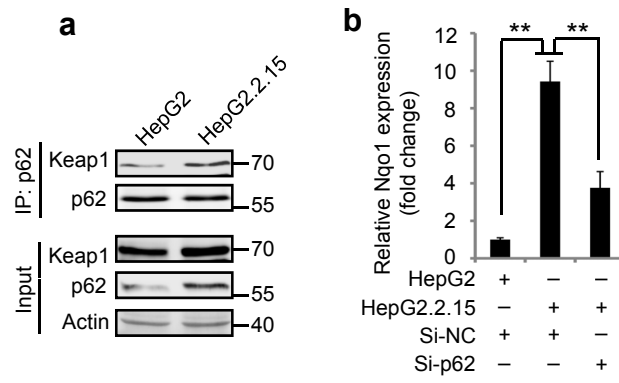

Supplementary Figure 3

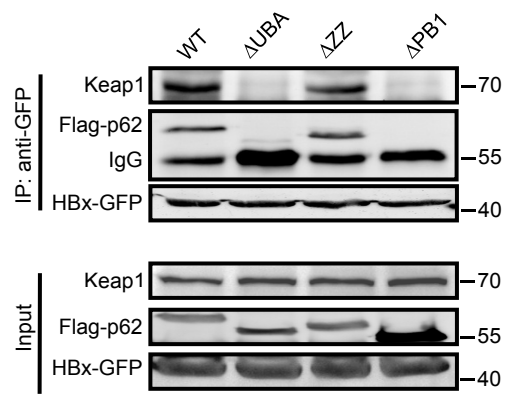

Supplementary Figure 4

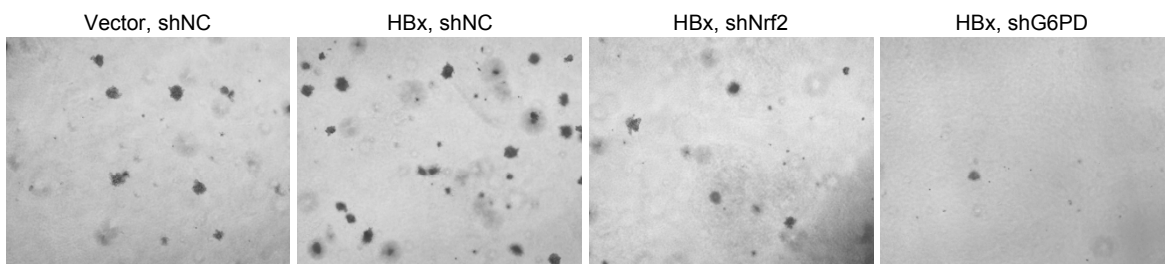

Supplementary Figure 5
